# Supplementary material for: Breathable, recyclable, and solvent-free conductive films: versatile processing for flexible biointerfaces
Source: Royal Society of Chemistry journal article supplement (doi:10.1039/d4tc05213g), 2025-01-01
Supplement: d4tc05213g2.pdf [file d4tc05213g2.pdf]

## Supporting Information

### **Breathable, recyclable, and solvent-free conductive films: versatile processing for flexible biointerfaces**

Yi Qian,<sup>a</sup> Yuyu Zhang,<sup>a</sup> Jinhao Huang,<sup>a</sup> Qiongya Li,<sup>b</sup> Fusheng Zhang<sup>\*ab</sup> and Guangyan Qing<sup>\*ab</sup>

<sup>a</sup> Hubei Key Laboratory of Biomass Fibers and Eco-dyeing & Finishing, College of Chemistry and Chemical Engineering, Wuhan Textile University, Wuhan 430200 P. R. China

<sup>b</sup> CAS Key Laboratory of Separation Science for Analytical Chemistry, Dalian Institute of Chemical Physics, Chinese Academy of Sciences, Dalian 116023, P. R. China

E-mail: fszhang@wtu.edu.cn, qinggy@dicp.ac.cn

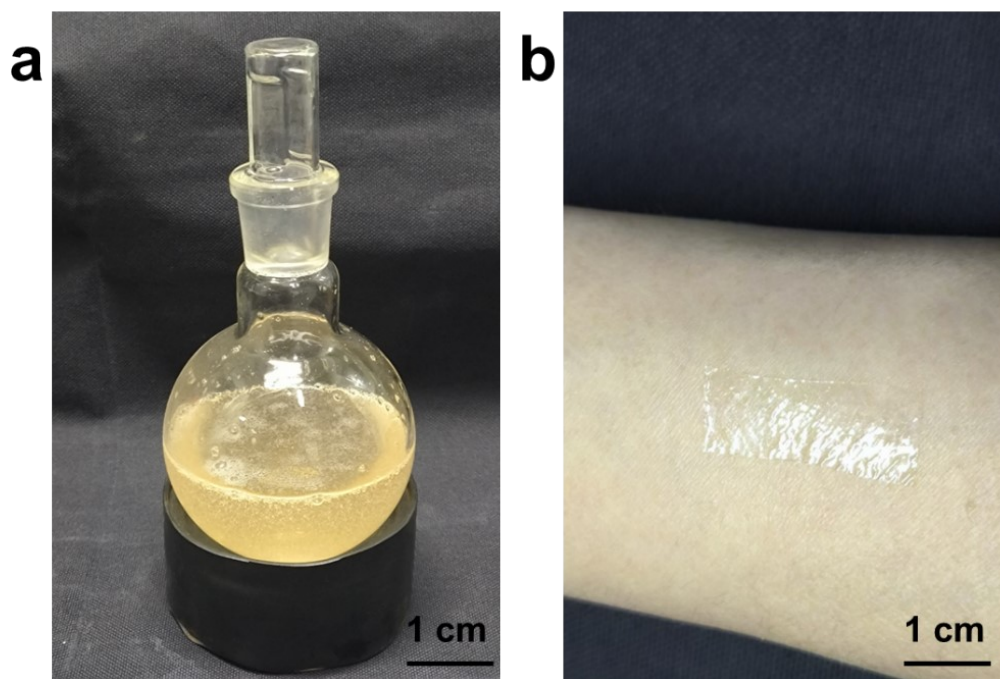

**Figure S1.** Images of precursor SIB ink (a) and SIB film on the human skin (b).

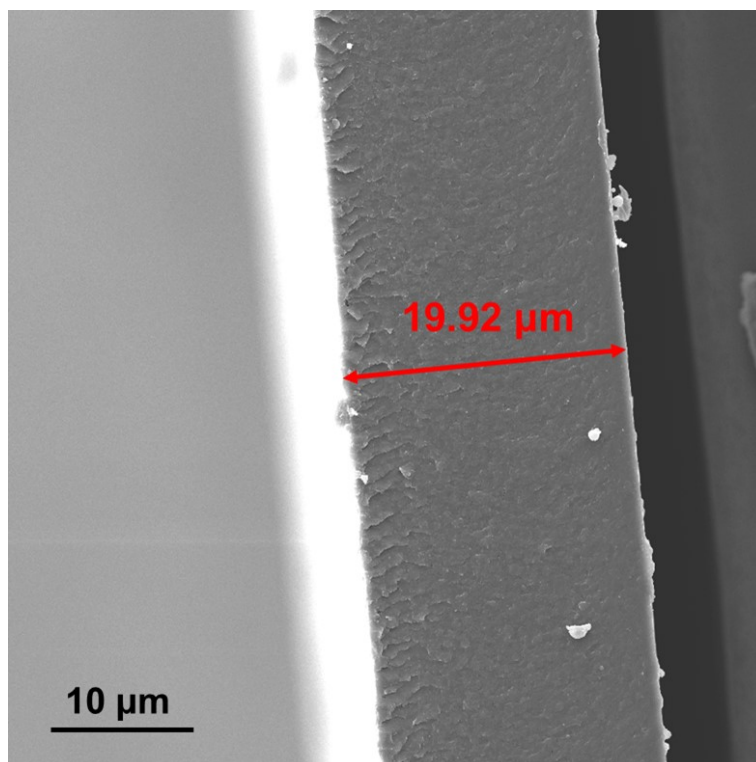

**Figure S2.** Cross-section SEM image of the SIB-2 film.

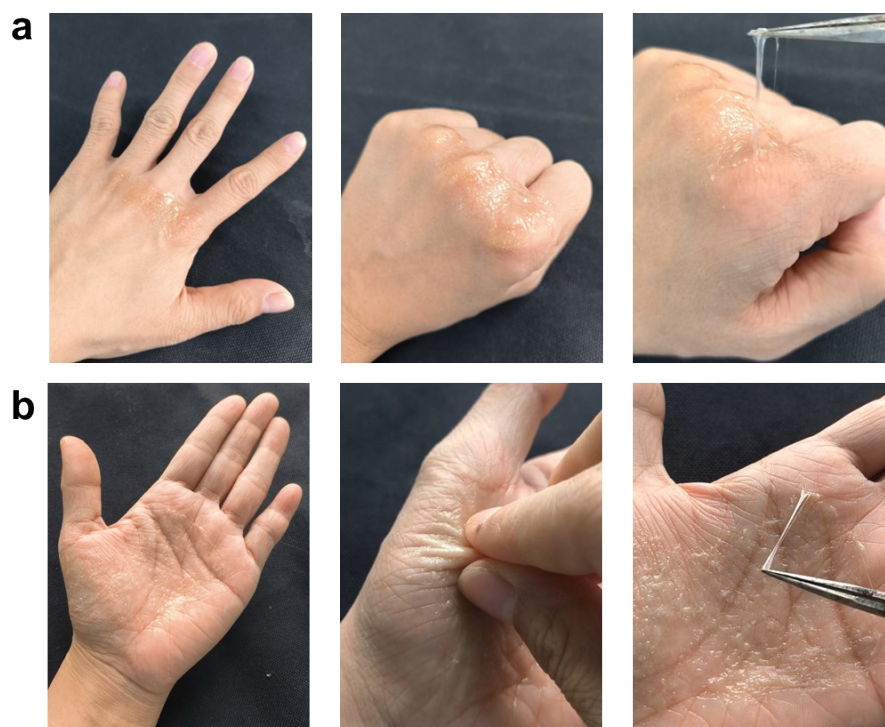

**Figure S3.** Applying SIB ink to the finger joint (a) or palm (b) allows for the rapid formation of films with adaptive adhesion.

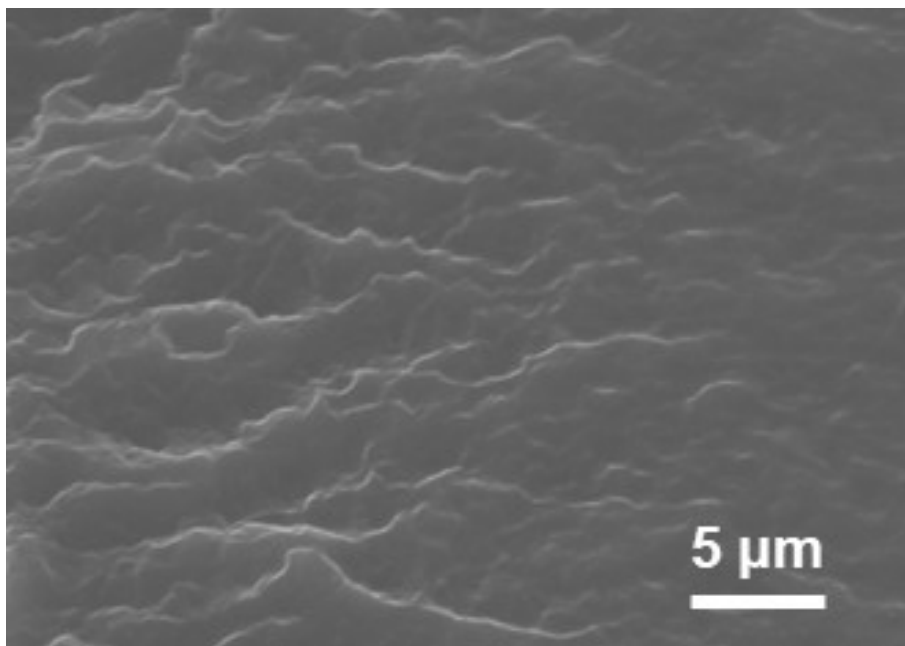

**Figure S4.** Cross-section SEM image of the SIB-2 film at high magnification.

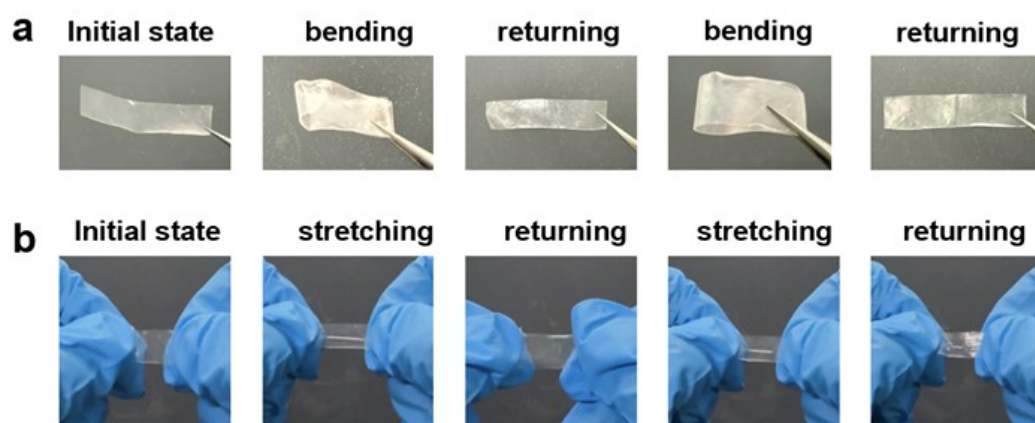

**Figure S5.** The repeated bending (a) and stretching tests (b) of the SIB-2 film.

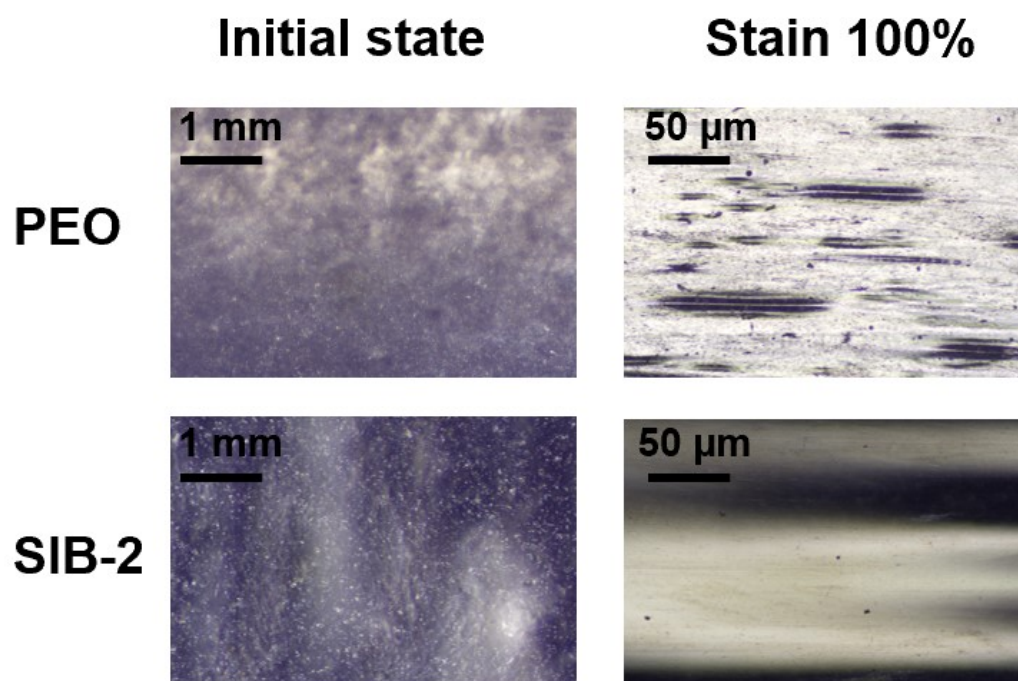

**Figure S6.** Comparison of initial state and 100% stretching images of pure PEO film and SIB-2 film.

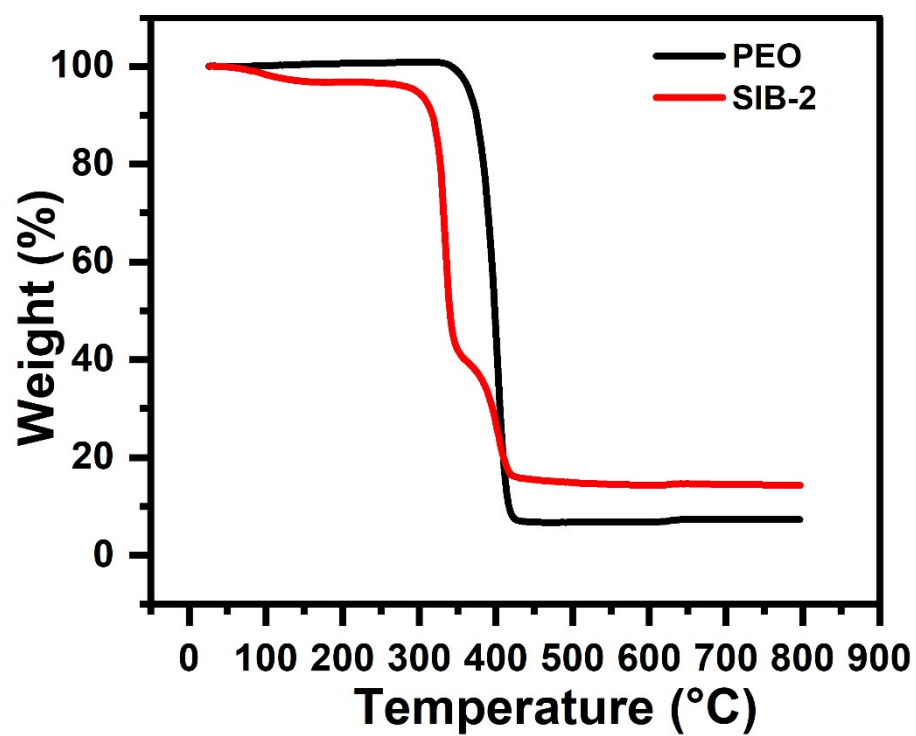

**Figure S7.** TGA curves for pure PEO film and SIB-2 film.



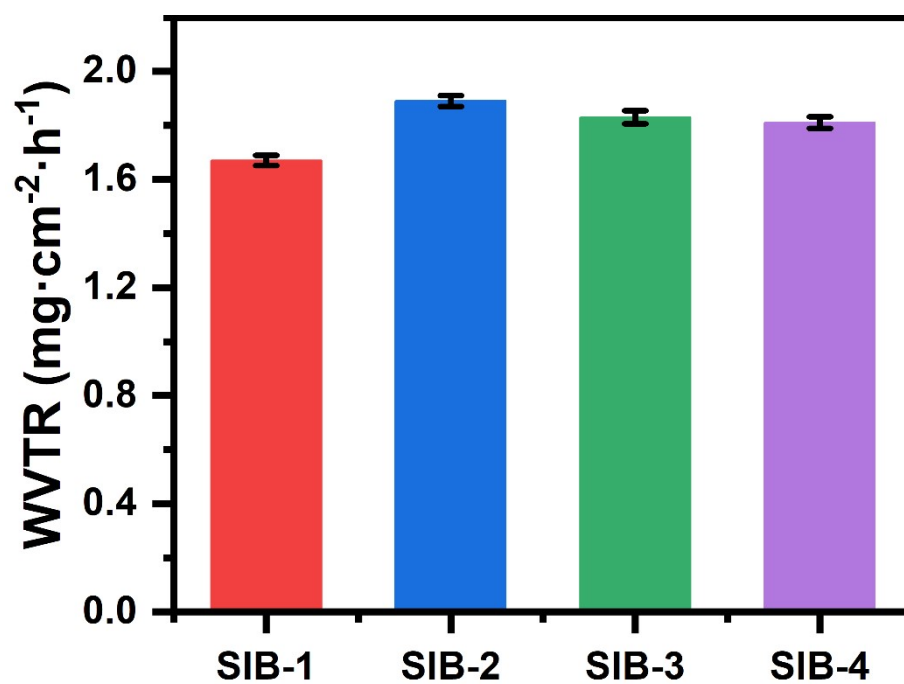

**Figure S8.** The WVTR of the pure PEO film and different SIB films.

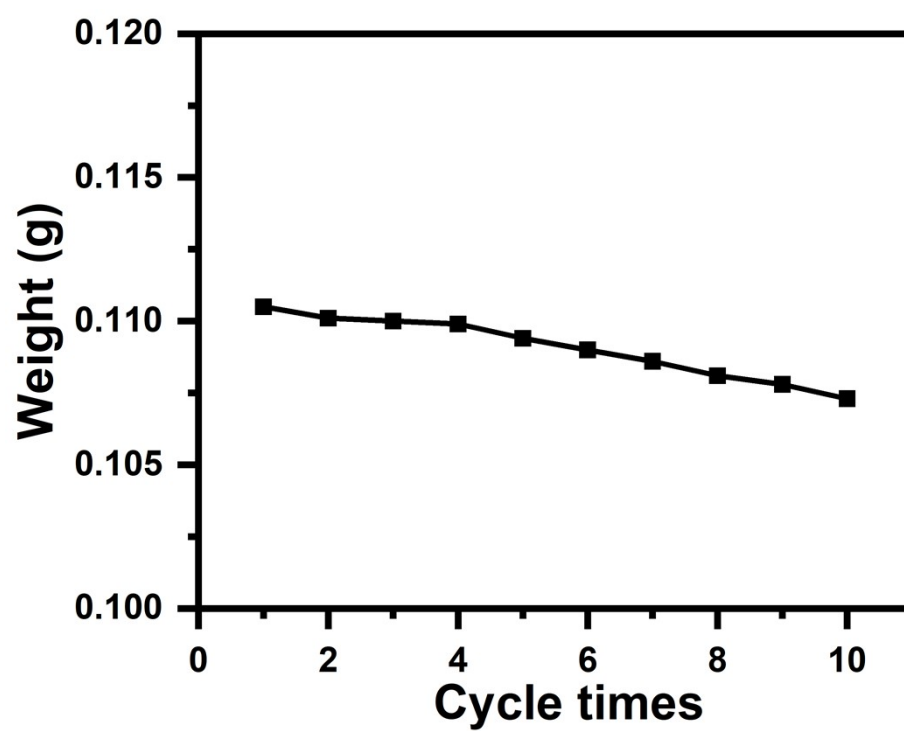

**Figure S9.** Weight measurements of the SIB-2 film after cycling from one to ten times.

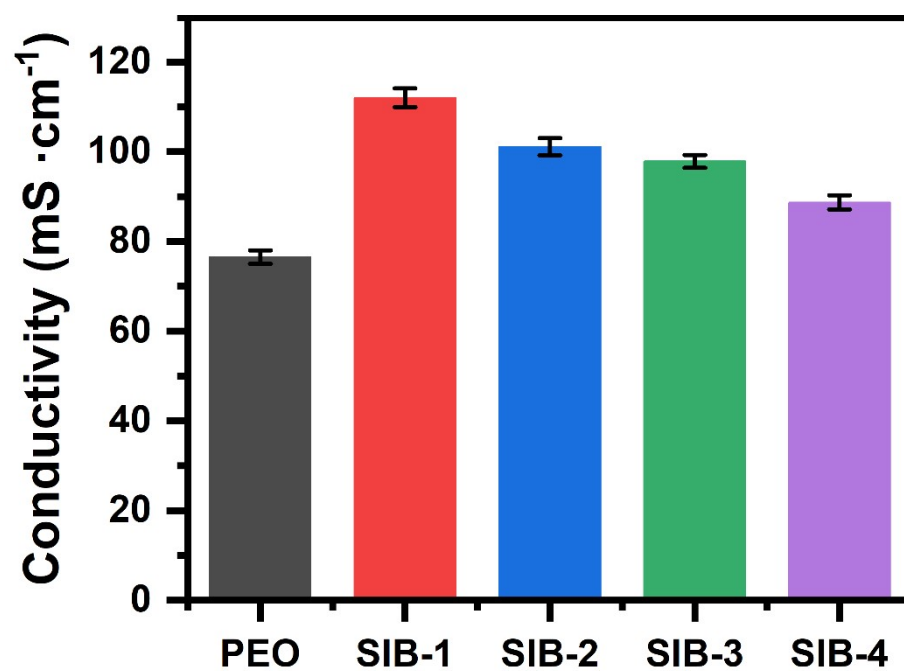

**Figure S10.** Conductivity of the pure PEO film and different SIB films.

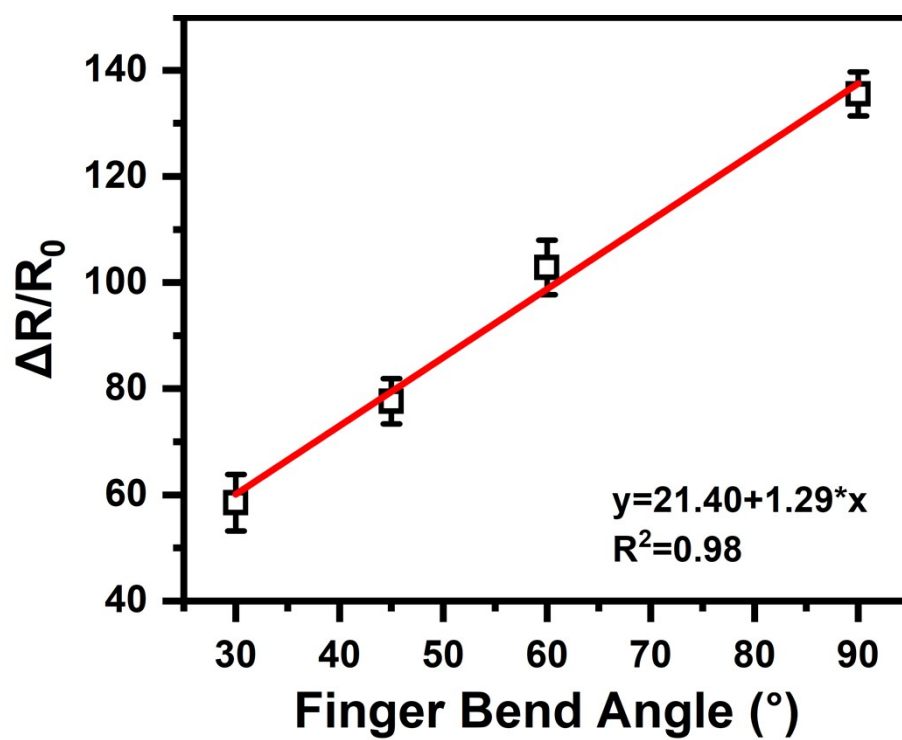

**Figure S11.** Relationship between  $\Delta R/R_0$  and the finger bend angle of the SIB-1 film.

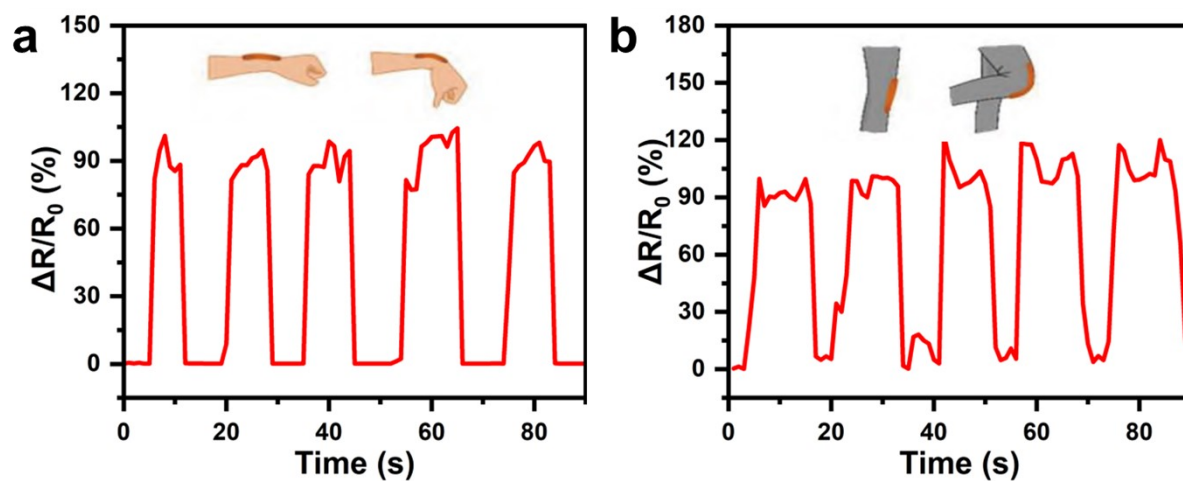

**Figure S12.** Relative resistance change curves of the SIB-1 film during repeated bending of the wrist (a) and knee (b).

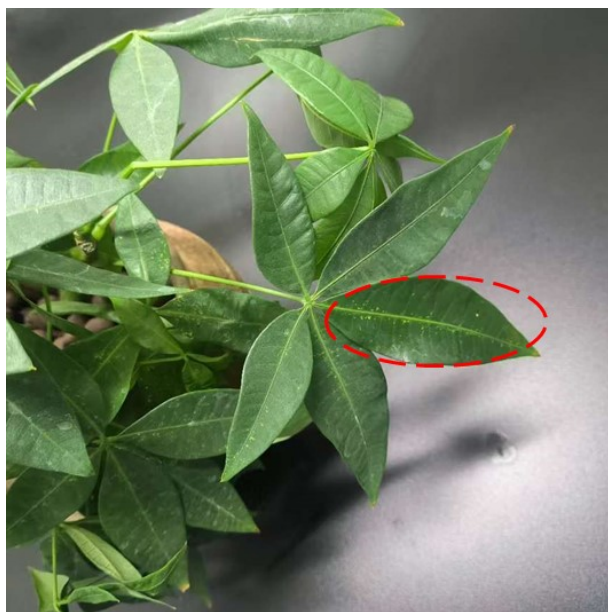

**Figure S13.** Photograph of a leaf covered with the SIB-1 film after 7 days.

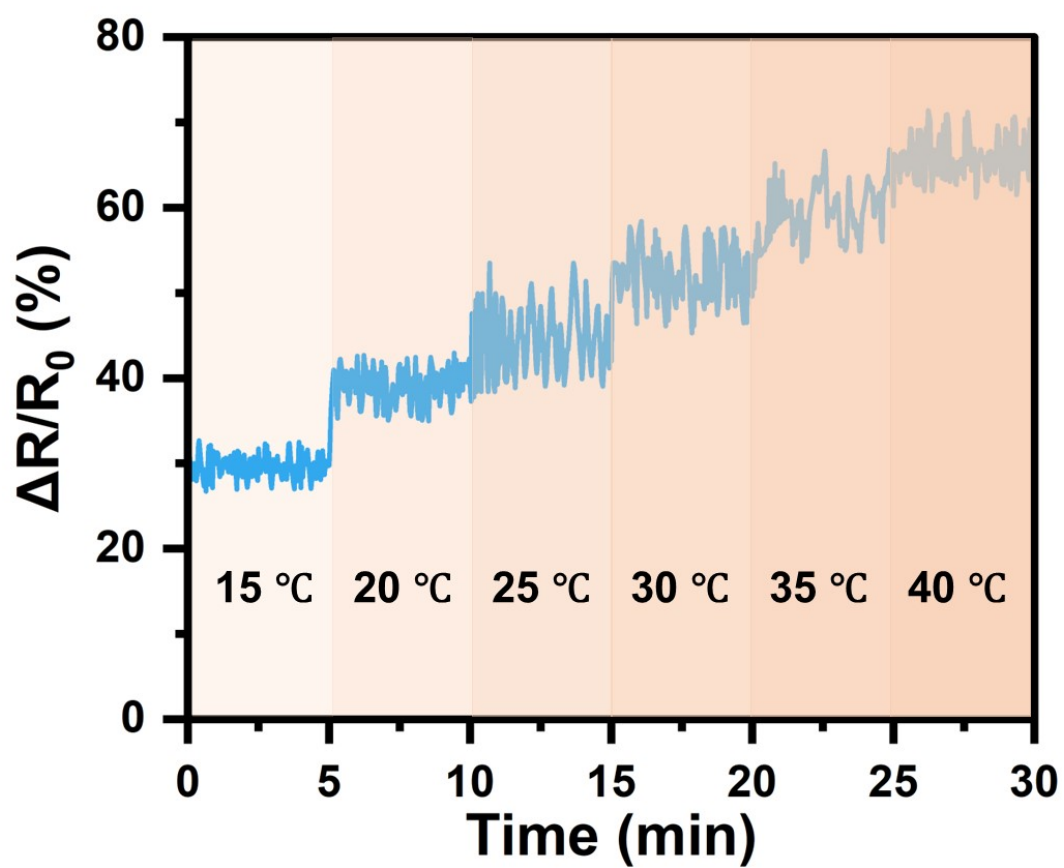

**Figure S14.** Relative resistance change curves of the SIB-1 film at different temperatures.

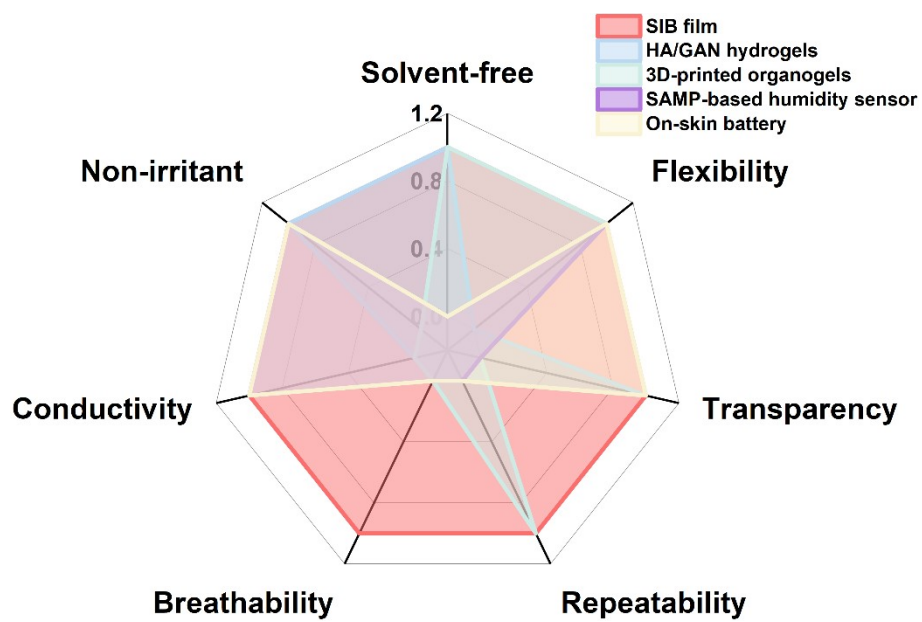

**Figure S15.** Comparison of comprehensive performance of biological interface materials.<sup>1-4</sup>



**Table S1.** Comparison of water vapour transmission rate (WVTR) with similar materials reported in the literature.

| Name of materials | WVTR ( $\text{mg}\cdot\text{cm}^{-2}\cdot\text{h}^{-1}$ ) |
|-------------------|-----------------------------------------------------------|
| SIB-2 film        | 1.89                                                      |
| PDMS              | 0.03                                                      |
| CE                | 0.04                                                      |
| CBPFB             | 0.0688                                                    |
| Parylene          | 0.0690                                                    |
| BNC               | 0.08875                                                   |
| 3M Tegater        | 0.5                                                       |
| HP band           | 1.0458                                                    |

**Table S2.** Comparison of comprehensive performance of biological interface materials.<sup>1-4</sup>

| Name of Materials                                 | Solvent<br>-free | Flexibility | Transparenc<br>y | Repeatabilit<br>y | Breathabilit<br>y | Conductivit<br>y | Non-<br>irritan<br>t |
|---------------------------------------------------|------------------|-------------|------------------|-------------------|-------------------|------------------|----------------------|
| SIB film                                          | √                | √           | √                | √                 | √                 | √                | √                    |
| HA/GAN<br>hydrogels <sup>1</sup>                  | √                | ×           | √                | ×                 | ×                 | ×                | √                    |
| 3D-printed<br>organogels <sup>2</sup>             | √                | √           | ×                | √                 | ×                 | ×                | ×                    |
| SAMP-<br>based<br>humidity<br>sensor <sup>3</sup> | ×                | √           | ×                | ×                 | ×                 | √                | √                    |
| On-skin<br>battery <sup>4</sup>                   | ×                | √           | √                | ×                 | ×                 | √                | √                    |

**Reference**

- 1 E. Larrañeta, M. Henry, N. J. Irwin, J. Trotter, A. A. Perminova and R. F. Donnelly, *Carbohydrate Polymers*, 2018, **181**, 1194–1205.
- 2 M. A. Kuzina, M. Hoffmann, N. K. Mandsberg, C. M. Domínguez, C. M. Niemeyer, M. Wilhelm and P. A. Levkin, *Advanced Functional Materials*, 2024, **34**, 2403694.
- 3 T. Li, T. Zhao, H. Zhang, L. Yuan, C. Cheng, J. Dai, L. Xue, J. Zhou, H. Liu, L. Yin and J. Zhang, *npj Flex Electron*, 2024, **8**, 1–9.
- 4 L. Gao, Z. Wang, Y. Zen, Y. Wang, Q. Ren, Z. Ding, K. Ni, J. Tang, C. Zhang, Y. Wang, Y. Zhou, J. Hui, Q. Lu, R. Liu and X. Zhang, *Advanced Functional Materials*, 2024, **34**, 2410140.
